# Supplementary material for: Genomic Evaluation of Coffea arabica and Its Wild Relative Coffea racemosa in Mozambique: Settling Resilience Keys for the Coffee Crop in the Context of Climate Change
Source: MDPI journal article supplement (doi:10.3390/plants12102044), 2023-05-20
Supplement: s1 [file s1]

Supporting Information Files

Figure S1. Mean Ln probability of data and Delta K based on Evanno’s ad hoc statistic obtained by STRUCTURE HARVESTER.

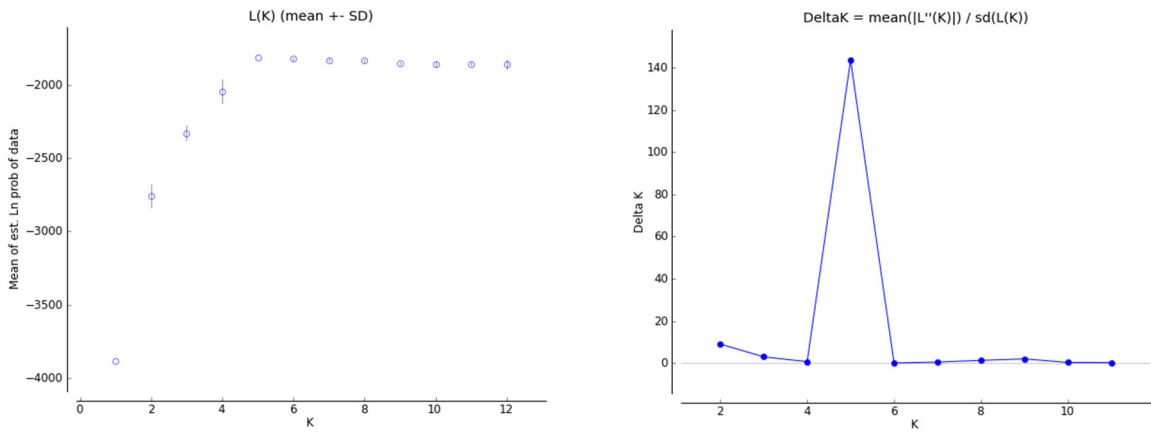

**Figure S2.** Scatter plot of Linkage disequilibrium decay ( $r^2$ ) against the genetic distance for pairs of linked SNPs considering *Coffea racemosa* and *Coffea arabica*.

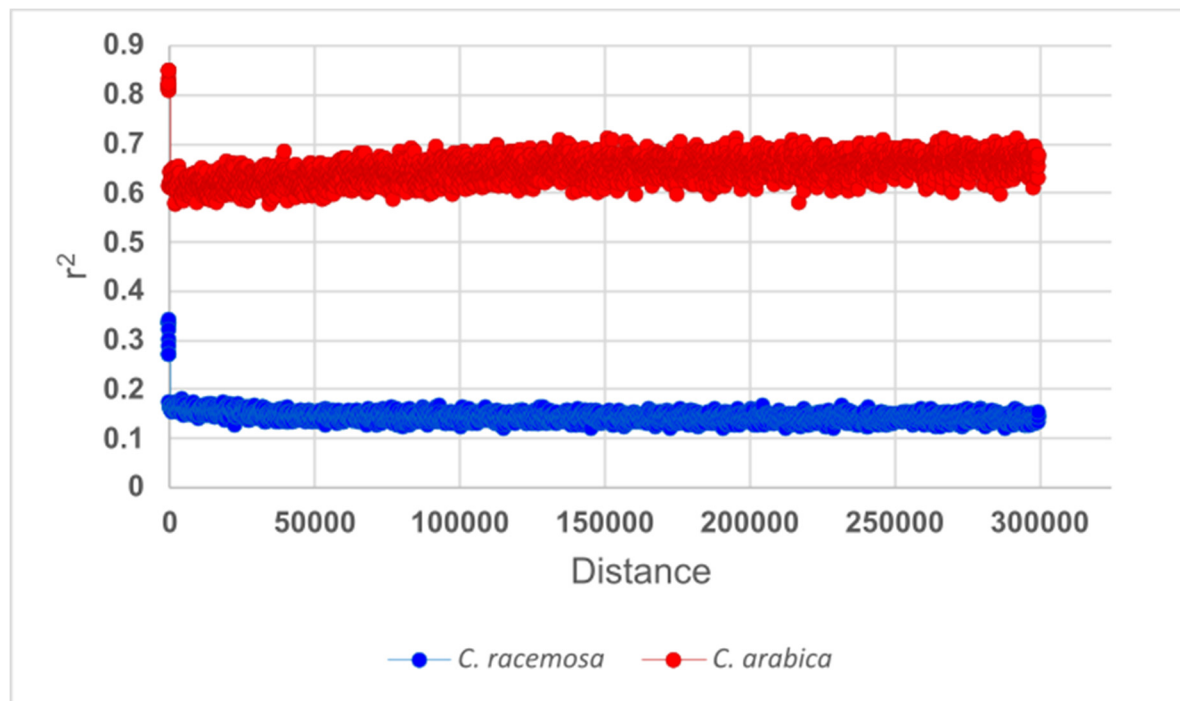

**Table S1.** Sampling information of *Coffea arabica* and *Coffea racemosa* sorted by geographical area including the individuals used for cpDNA (*rbcL* and *matK*), SSRs and SNPs analyses. Genbank numbers indicate the new sequences obtained in this study.

| ID   | Species                | Province  | Population | Latitude  | Longitude | <i>rbcL</i> | <i>matK</i> | SSRs | SNPs |
|------|------------------------|-----------|------------|-----------|-----------|-------------|-------------|------|------|
| IR01 | <i>Coffea racemosa</i> | Inhambane | Inharrime  | -24,30259 | 34,90368  | OP207780    | OP320952    | x    | x    |
| IR02 | <i>Coffea racemosa</i> | Inhambane | Inharrime  | -24,47284 | 35,03484  | OP207781    | OP320953    | x    | x    |
| IR03 | <i>Coffea racemosa</i> | Inhambane | Inharrime  | -24,47282 | 35,03481  | OP207782    | OP320954    | x    |      |
| IR04 | <i>Coffea racemosa</i> | Inhambane | Inharrime  | -24,47329 | 35,02921  | OP207783    | OP320955    | x    |      |
| IR05 | <i>Coffea racemosa</i> | Inhambane | Inharrime  | -24,47431 | 35,02438  | OP207784    | OP320956    | x    |      |
| IR06 | <i>Coffea racemosa</i> | Inhambane | Inharrime  | -24,45185 | 35,01889  | OP207785    | OP320957    | x    |      |
| ZV01 | <i>Coffea racemosa</i> | Inhambane | Zavala     | -24,50669 | 34,99925  | OP207786    | OP320958    | x    | x    |
| ZV02 | <i>Coffea racemosa</i> | Inhambane | Zavala     | -24,50669 | 34,99922  | OP207787    | OP320959    | x    |      |
| ZV03 | <i>Coffea racemosa</i> | Inhambane | Zavala     | -24,54388 | 34,88284  | OP207788    | OP320960    | x    |      |
| ZV05 | <i>Coffea racemosa</i> | Inhambane | Zavala     | -24,68345 | 34,54291  | OP207789    | OP320961    | x    |      |
| ZV06 | <i>Coffea racemosa</i> | Inhambane | Zavala     | -24,68415 | 34,54329  | OP207790    | OP320962    | x    |      |
| ZV07 | <i>Coffea racemosa</i> | Inhambane | Zavala     | -24,68736 | 34,54589  | OP207791    | OP320963    | x    |      |
| Ho01 | <i>Coffea racemosa</i> | Inhambane | Homoine    | -23,87354 | 35,24534  | OP207792    | OP320964    | x    |      |
| HO03 | <i>Coffea racemosa</i> | Inhambane | Homoine    | -23,87354 | 35,24826  | OP207793    | OP320965    | x    | x    |
| HO04 | <i>Coffea racemosa</i> | Inhambane | Homoine    | -23,89639 | 35,15764  | OP207794    | OP320966    | x    | x    |
| HO05 | <i>Coffea racemosa</i> | Inhambane | Homoine    | -23,89639 | 35,15766  | OP207795    | OP320967    | x    |      |
| HO06 | <i>Coffea racemosa</i> | Inhambane | Homoine    | -23,88346 | 35,15156  | OP207796    | OP320968    | x    |      |
| HO07 | <i>Coffea racemosa</i> | Inhambane | Homoine    | -23,88332 | 35,15153  | OP207797    | OP320969    | x    |      |
| MX01 | <i>Coffea racemosa</i> | Inhambane | Maxixe     | -23,86021 | 35,33956  | OP207798    | OP320970    | x    |      |
| MX02 | <i>Coffea racemosa</i> | Inhambane | Maxixe     | -23,83998 | 35,34383  | OP207799    | OP320971    | x    |      |
| MX03 | <i>Coffea racemosa</i> | Inhambane | Maxixe     | -23,82475 | 35,34215  | OP207800    | OP320972    | x    | x    |
| MX04 | <i>Coffea racemosa</i> | Inhambane | Maxixe     | -23,82475 | 35,34218  | OP207801    | OP320973    | x    |      |
| MX05 | <i>Coffea racemosa</i> | Inhambane | Maxixe     | -23,82457 | 35,34183  | OP207802    | OP320974    | x    | x    |
| MX08 | <i>Coffea racemosa</i> | Inhambane | Maxixe     | -23,82476 | 35,34279  | OP207803    | OP320975    | x    |      |
| MR02 | <i>Coffea racemosa</i> | Inhambane | Morrumbene | -23,61939 | 35,24733  | OP207804    | OP320976    | x    | x    |
| MR03 | <i>Coffea racemosa</i> | Inhambane | Morrumbene | -23,61931 | 35,24752  | OP207805    | OP320977    | x    | x    |
| MR04 | <i>Coffea racemosa</i> | Inhambane | Morrumbene | -23,61926 | 35,24751  | OP207806    | OP320978    | x    |      |
| MR05 | <i>Coffea racemosa</i> | Inhambane | Morrumbene | -23,61922 | 35,24752  | OP207807    | OP320979    | x    |      |

|                   |                                     |           |            |           |          |          |          |   |   |
|-------------------|-------------------------------------|-----------|------------|-----------|----------|----------|----------|---|---|
| <b>MR06</b>       | <i>Coffea racemosa</i>              | Inhambane | Morrumbene | -23,69177 | 35,31211 | OP207808 | OP320980 | x |   |
| <b>MP02</b>       | <i>Coffea racemosa</i>              | Maputo    | Matola     | -25,92764 | 32,54849 | OP207809 | OP320981 | x |   |
| <b>MP03</b>       | <i>Coffea racemosa</i>              | Maputo    | Matola     | -25,96622 | 32,46106 | OP207810 | OP320982 | x |   |
| <b>MP04</b>       | <i>Coffea racemosa</i>              | Maputo    | Matola     | -25,95636 | 32,45265 | OP207811 | OP320983 | x | x |
| <b>MP05</b>       | <i>Coffea racemosa</i>              | Maputo    | Matola     | -25,95733 | 32,45744 | OP207812 | OP320984 | x | x |
| <b>MP06</b>       | <i>Coffea racemosa</i>              | Maputo    | Matola     | -25,95636 | 32,45255 | OP207813 | OP320985 | x |   |
| <b>MP07</b>       | <i>Coffea racemosa</i>              | Maputo    | Matola     | -25,95623 | 32,45265 | OP207814 | OP320986 | x |   |
| <b>MP08</b>       | <i>Coffea racemosa</i>              | Maputo    | Matola     | -25,95636 | 32,45232 | OP207815 | OP320987 | x | x |
| <b>MP09</b>       | <i>Coffea racemosa</i>              | Maputo    | Matola     | -25,95625 | 32,45245 | OP207816 | OP320988 | x |   |
| <b>MP10</b>       | <i>Coffea racemosa</i>              | Maputo    | Matola     | -25,95321 | 32,45231 | OP207817 | OP320989 | x |   |
| <b>SF02</b>       | <i>Coffea racemosa</i>              | Sofala    | Gorongosa  | -18,56341 | 34,08541 | OP207818 | OP320990 | x |   |
| <b>SF05</b>       | <i>Coffea racemosa</i>              | Sofala    | Gorongosa  | -19,06242 | 34,25271 | OP207819 | OP320991 | x | x |
| <b>SF06</b>       | <i>Coffea racemosa</i>              | Sofala    | Gorongosa  | -18,56271 | 39,08541 | OP207820 | OP320992 | x |   |
| <b>SF07</b>       | <i>Coffea racemosa</i>              | Sofala    | Gorongosa  | -18,56341 | 34,09212 | OP207821 | OP320993 | x |   |
| <b>SF08</b>       | <i>Coffea racemosa</i>              | Sofala    | Gorongosa  | -19,00011 | 34,12044 | OP207822 | OP320994 | x |   |
| <b>SF17</b>       | <i>Coffea racemosa</i>              | Sofala    | Gorongosa  | -18,56234 | 34,09189 | OP207823 | OP320995 | x |   |
| <b>SF21</b>       | <i>Coffea racemosa</i>              | Sofala    | Gorongosa  | -18,56224 | 34,09196 | OP207824 | OP320996 | x |   |
| <b>SF25</b>       | <i>Coffea racemosa</i>              | Sofala    | Gorongosa  | -18,56235 | 34,08568 | OP207825 | OP320997 | x |   |
| <b>SF29</b>       | <i>Coffea racemosa</i>              | Sofala    | Gorongosa  | -18,56199 | 34,08572 | OP207826 | OP320998 | x |   |
| <b>SF31</b>       | <i>Coffea racemosa</i>              | Sofala    | Gorongosa  | -18,56167 | 34,08555 | OP207827 | OP320999 | x |   |
| <b>NIA01</b>      | <i>Coffea arabica</i>               | Niassa    | Maua       | -13,44471 | 36,59212 | OP207828 | OP321000 | x |   |
| <b>NIA02</b>      | <i>Coffea arabica</i>               | Niassa    | Maua       | -13,44471 | 36,59229 | OP207829 | OP321001 | x |   |
| <b>NIA03</b>      | <i>Coffea arabica</i>               | Niassa    | Maua       | -13,19508 | 35,14472 | OP207830 | OP321002 | x |   |
| <b>NIA04</b>      | <i>Coffea arabica</i>               | Niassa    | Maua       | -13,19508 | 35,14485 | OP207831 | OP321003 | x |   |
| <b>NIA05</b>      | <i>Coffea arabica</i>               | Niassa    | Maua       | -12,52288 | 35,43506 | OP207832 | OP321004 | x |   |
| <b>NIA06</b>      | <i>Coffea arabica</i>               | Niassa    | Maua       | -12,52288 | 35,43506 | OP207833 | OP321005 | x |   |
| <b>NIA07</b>      | <i>Coffea arabica</i>               | Niassa    | Maua       | -13,20231 | 35,16513 | OP207834 | OP321006 | x |   |
| <b>NIA08</b>      | <i>Coffea arabica</i>               | Niassa    | Maua       | -13,20232 | 35,16511 | OP207835 | OP321007 | x |   |
| <b>Ca-A650-P1</b> | <i>C. arabica</i> cv. Costa Rica 95 | Sofala    | PNG        | -18,51435 | 34,05135 | OP207836 | OP321008 | x |   |
| <b>Ca-A650-P2</b> | <i>C. arabica</i> cv. Costa Rica 95 | Sofala    | PNG        | -18,51431 | 34,05133 | OP207837 | OP321009 | x |   |
| <b>Ca-A650-P3</b> | <i>C. arabica</i> cv. Costa Rica 95 | Sofala    | PNG        | -18,51439 | 34,05121 | OP207838 | OP321010 | x | x |

|                    |                                     |        |          |           |          |          |          |   |   |
|--------------------|-------------------------------------|--------|----------|-----------|----------|----------|----------|---|---|
| <b>Ca-A650-P6</b>  | <i>C. arabica</i> cv. Costa Rica 95 | Sofala | PNG      | -18,51428 | 34,05132 | OP207839 | OP321011 | x | x |
| <b>Ca-A650-P7</b>  | <i>C. arabica</i> cv. Costa Rica 95 | Sofala | PNG      | -18,51427 | 34,05128 | OP207840 | OP321012 | x | x |
| <b>Ca-A650-P8</b>  | <i>C. arabica</i> cv. Costa Rica 95 | Sofala | PNG      | -18,51436 | 34,05124 | OP207841 | OP321013 | x | x |
| <b>Ca-A650-P11</b> | <i>C. arabica</i> cv. Costa Rica 95 | Sofala | PNG      | -18,51448 | 34,05127 | OP207842 | OP321014 | x | x |
| <b>Ca-A650-P12</b> | <i>C. arabica</i> cv. Costa Rica 95 | Sofala | PNG      | -18,51466 | 34,05122 | OP207843 | OP321015 | x |   |
| <b>Ca-A650-P13</b> | <i>C. arabica</i> cv. Costa Rica 95 | Sofala | PNG      | -18,51469 | 34,05125 | OP207844 | OP321016 | x |   |
| <b>Ca-A825-P16</b> | <i>C. arabica</i> cv. Costa Rica 95 | Sofala | PNG      | -18,50061 | 34,04907 | OP207845 | OP321017 | x | x |
| <b>Ca-A825-P17</b> | <i>C. arabica</i> cv. Costa Rica 95 | Sofala | PNG      | -18,50062 | 34,04911 | OP207846 | OP321018 | x |   |
| <b>Ca-A825-P18</b> | <i>C. arabica</i> cv. Costa Rica 95 | Sofala | PNG      | -18,50073 | 34,04921 | OP207847 | OP321019 | x | x |
| <b>Ca-A825-P21</b> | <i>C. arabica</i> cv. Costa Rica 95 | Sofala | PNG      | -18,50059 | 34,04905 | OP207848 | OP321020 | x |   |
| <b>Ca-A825-P22</b> | <i>C. arabica</i> cv. Costa Rica 95 | Sofala | PNG      | -18,50062 | 34,04904 | OP207849 | OP321021 | x | x |
| <b>Ca-A825-P23</b> | <i>C. arabica</i> cv. Costa Rica 95 | Sofala | PNG      | -18,50062 | 34,04901 | OP207850 | OP321022 | x | x |
| <b>Ca-A825-P26</b> | <i>C. arabica</i> cv. Costa Rica 95 | Sofala | PNG      | -18,50043 | 34,04907 | OP207851 | OP321023 | x | x |
| <b>Ca-A825-P27</b> | <i>C. arabica</i> cv. Costa Rica 95 | Sofala | PNG      | -18,50043 | 34,04906 | OP207852 | OP321024 | x |   |
| <b>Ca-A825-P28</b> | <i>C. arabica</i> cv. Costa Rica 95 | Sofala | PNG      | -18,50081 | 34,04949 | OP207853 | OP321025 | x |   |
| <b>Ca-A935-P31</b> | <i>C. arabica</i> cv. Costa Rica 95 | Sofala | PNG      | -18,48163 | 34,04477 | OP207854 | OP321026 | x |   |
| <b>Ca-A935-P32</b> | <i>C. arabica</i> cv. Costa Rica 95 | Sofala | PNG      | -18,48162 | 34,04478 | OP207855 | OP321027 | x |   |
| <b>Ca-A935-P33</b> | <i>C. arabica</i> cv. Costa Rica 95 | Sofala | PNG      | -18,48163 | 34,04475 | OP207856 | OP321028 | x | x |
| <b>Ca-A935-P37</b> | <i>C. arabica</i> cv. Costa Rica 95 | Sofala | PNG      | -18,48158 | 34,04469 | OP207857 | OP321029 | x | x |
| <b>Ca-A935-P38</b> | <i>C. arabica</i> cv. Costa Rica 95 | Sofala | PNG      | -18,48158 | 34,04469 | OP207858 | OP321030 | x | x |
| <b>Ca-A935-P41</b> | <i>C. arabica</i> cv. Costa Rica 95 | Sofala | PNG      | -18,48151 | 34,04467 | OP207859 | OP321031 | x | x |
| <b>Ca-A935-P42</b> | <i>C. arabica</i> cv. Costa Rica 95 | Sofala | PNG      | -18,48151 | 34,04466 | OP207860 | OP321032 | x |   |
| <b>Ca-A935-P43</b> | <i>C. arabica</i> cv. Costa Rica 95 | Sofala | PNG      | -18,48187 | 34,04402 | OP207861 | OP321033 | x | x |
| <b>Ca-A935-P44</b> | <i>C. arabica</i> cv. Costa Rica 95 | Sofala | PNG      |           |          | OP207862 | OP321034 | x |   |
| <b>Cv7960</b>      | <i>C. arabica</i>                   |        | Cultivar |           |          | OP207863 | OP321035 | x |   |
| <b>Cv7963</b>      | <i>C. arabica</i>                   |        | Cultivar |           |          | OP207864 | OP321036 | x |   |
| <b>Cv7958</b>      | <i>C. arabica</i>                   |        | Cultivar |           |          | OP207865 | OP321037 | x |   |

**Table S2.** KEGG pathways found in *Coffea racemosa* and *Coffea arabica*.

| <b>pathways</b>                             | <i>Coffea<br/>racemosa</i> | <i>Coffea<br/>arabica</i> |
|---------------------------------------------|----------------------------|---------------------------|
| Plant-pathogen interaction                  | 141                        | 95                        |
| Protein processing in endoplasmic reticulum | 93                         | 94                        |
| Phenylpropanoid biosynthesis                | 75                         | 75                        |
| Starch and sucrose metabolism               | 71                         | 74                        |
| NF-kappa B signaling pathway                | 72                         | 72                        |
| Spliceosome                                 | 68                         | 68                        |
| RNA transport                               | 66                         | 66                        |
| Plant hormone signal transduction           | 77                         | 66                        |
| MAPK signaling pathway - plant              | 66                         | 63                        |
| Cell cycle                                  | 61                         | 61                        |
| Purine metabolism                           | 55                         | 54                        |
| Endocytosis                                 | 55                         | 55                        |
| mRNA surveillance pathway                   | 54                         | 52                        |
| Ubiquitin mediated proteolysis              | 53                         | 52                        |
| RNA degradation                             | 45                         | 45                        |
| Ribosome                                    | 44                         | 43                        |
| Amino sugar and nucleotide sugar metabolism | 41                         | 42                        |
| Oocyte meiosis                              | 42                         | 41                        |
| Pyrimidine metabolism                       | 41                         | 41                        |
| Phosphatidylinositol signaling system       | 41                         | 41                        |
| Autophagy - animal                          | 40                         | 40                        |
| Inositol phosphate metabolism               | 39                         | 39                        |
| Glycolysis / Gluconeogenesis                | 37                         | 37                        |
| Ribosome biogenesis in eukaryotes           | 36                         | 36                        |
| Glycine, serine and threonine metabolism    | 35                         | 35                        |
| ABC transporters                            | 35                         | 35                        |
| Pentose and glucuronate interconversions    | 35                         | 34                        |
| Tyrosine metabolism                         | 32                         | 32                        |
| Aminoacyl-tRNA biosynthesis                 | 32                         | 32                        |

|                                                       |    |    |
|-------------------------------------------------------|----|----|
| Galactose metabolism                                  | 30 | 30 |
| Glycerophospholipid metabolism                        | 30 | 30 |
| Carbon fixation in photosynthetic organisms           | 30 | 30 |
| Phenylalanine metabolism                              | 29 | 29 |
| Cyanoamino acid metabolism                            | 29 | 29 |
| Regulation of actin cytoskeleton                      | 29 | 29 |
| Alanine, aspartate and glutamate metabolism           | 28 | 28 |
| cAMP signaling pathway                                | 28 | 28 |
| Phospholipase D signaling pathway                     | 28 | 28 |
| Glutathione metabolism                                | 27 | 27 |
| Isoquinoline alkaloid biosynthesis                    | 27 | 27 |
| Nucleotide excision repair                            | 27 | 27 |
| Fanconi anemia pathway                                | 27 | 27 |
| Sphingolipid signaling pathway                        | 27 | 27 |
| Carotenoid biosynthesis                               | 26 | 26 |
| Quorum sensing                                        | 26 | 26 |
| Cellular senescence                                   | 26 | 26 |
| Cysteine and methionine metabolism                    | 25 | 25 |
| Oxidative phosphorylation                             | 24 | 24 |
| Glyoxylate and dicarboxylate metabolism               | 24 | 24 |
| One carbon pool by folate                             | 24 | 24 |
| Stilbenoid, diarylheptanoid and gingerol biosynthesis | 24 | 24 |
| Ras signaling pathway                                 | 24 | 24 |
| AMPK signaling pathway                                | 24 | 24 |
| Glycerolipid metabolism                               | 23 | 23 |
| Ascorbate and aldarate metabolism                     | 22 | 22 |
| Arginine biosynthesis                                 | 22 | 22 |
| Pyruvate metabolism                                   | 22 | 22 |
| Sesquiterpenoid and triterpenoid biosynthesis         | 22 | 22 |
| Phagosome                                             | 22 | 22 |
| Tight junction                                        | 22 | 22 |
| Fructose and mannose metabolism                       | 21 | 21 |

|                                                        |    |    |
|--------------------------------------------------------|----|----|
| Phenylalanine, tyrosine and tryptophan biosynthesis    | 21 | 21 |
| Nitrogen metabolism                                    | 21 | 21 |
| DNA replication                                        | 21 | 21 |
| MAPK signaling pathway                                 | 21 | 21 |
| mTOR signaling pathway                                 | 21 | 21 |
| PI3K-Akt signaling pathway                             | 21 | 21 |
| Necroptosis                                            | 21 | 21 |
| TGF-beta signaling pathway                             | 21 | 21 |
| Ubiquinone and other terpenoid-quinone biosynthesis    | 20 | 20 |
| Methane metabolism                                     | 20 | 20 |
| Wnt signaling pathway                                  | 20 | 20 |
| Circadian rhythm - plant                               | 20 | 20 |
| Pentose phosphate pathway                              | 19 | 19 |
| Thiamine metabolism                                    | 19 | 19 |
| Proteasome                                             | 19 | 19 |
| Mismatch repair                                        | 19 | 19 |
| Autophagy - other                                      | 19 | 19 |
| Peroxisome                                             | 19 | 19 |
| Ether lipid metabolism                                 | 18 | 18 |
| Flavonoid biosynthesis                                 | 18 | 18 |
| Lysosome                                               | 18 | 18 |
| Apoptosis                                              | 18 | 18 |
| beta-Alanine metabolism                                | 17 | 17 |
| RNA polymerase                                         | 17 | 17 |
| Homologous recombination                               | 17 | 17 |
| FoxO signaling pathway                                 | 17 | 17 |
| Fatty acid degradation                                 | 16 | 16 |
| Terpenoid backbone biosynthesis                        | 16 | 16 |
| cGMP-PKG signaling pathway                             | 16 | 16 |
| Lysine degradation                                     | 15 | 15 |
| Diterpenoid biosynthesis                               | 15 | 15 |
| Tropane, piperidine and pyridine alkaloid biosynthesis | 15 | 15 |



|                                              |    |    |
|----------------------------------------------|----|----|
| Arginine and proline metabolism              | 14 | 14 |
| Tryptophan metabolism                        | 14 | 14 |
| Folate biosynthesis                          | 14 | 14 |
| Hedgehog signaling pathway                   | 14 | 14 |
| Linoleic acid metabolism                     | 13 | 13 |
| alpha-Linolenic acid metabolism              | 13 | 13 |
| Protein export                               | 12 | 13 |
| Citrate cycle (TCA cycle)                    | 12 | 12 |
| Porphyrin and chlorophyll metabolism         | 12 | 12 |
| HIF-1 signaling pathway                      | 12 | 12 |
| Apelin signaling pathway                     | 12 | 12 |
| Focal adhesion                               | 12 | 12 |
| Carbon fixation pathways in prokaryotes      | 11 | 11 |
| Sulfur metabolism                            | 11 | 11 |
| Metabolism of xenobiotics by cytochrome P450 | 11 | 11 |
| Mitophagy - animal                           | 11 | 11 |
| Ferroptosis                                  | 11 | 11 |
| Brassinosteroid biosynthesis                 | 10 | 10 |
| Calcium signaling pathway                    | 10 | 10 |
| Gap junction                                 | 10 | 10 |
| Fatty acid biosynthesis                      | 9  | 9  |
| Steroid biosynthesis                         | 9  | 9  |
| Valine, leucine and isoleucine degradation   | 9  | 9  |
| Hippo signaling pathway                      | 9  | 9  |
| Other glycan degradation                     | 8  | 8  |
| Propanoate metabolism                        | 8  | 8  |
| Zeatin biosynthesis                          | 8  | 8  |
| Basal transcription factors                  | 8  | 8  |
| Base excision repair                         | 8  | 8  |
| Aminobenzoate degradation                    | 7  | 7  |
| Styrene degradation                          | 7  | 7  |
| Pantothenate and CoA biosynthesis            | 7  | 7  |

|                                                          |   |   |
|----------------------------------------------------------|---|---|
| Rap1 signaling pathway                                   | 7 | 7 |
| Signaling pathways regulating pluripotency of stem cells | 7 | 7 |
| Cutin, suberine and wax biosynthesis                     | 6 | 6 |
| Other types of O-glycan biosynthesis                     | 6 | 6 |
| Biofilm formation - Escherichia coli                     | 6 | 6 |
| ErbB signaling pathway                                   | 6 | 6 |
| VEGF signaling pathway                                   | 6 | 6 |
| Adherens junction                                        | 6 | 6 |
| TNF signaling pathway                                    | 6 | 6 |
| Photosynthesis                                           | 5 | 5 |
| Caffeine metabolism                                      | 5 | 5 |
| Taurine and hypotaurine metabolism                       | 5 | 5 |
| Lipopolysaccharide biosynthesis                          | 5 | 5 |
| Sphingolipid metabolism                                  | 5 | 5 |
| Nicotinate and nicotinamide metabolism                   | 5 | 5 |
| Retinol metabolism                                       | 5 | 5 |
| Glucosinolate biosynthesis                               | 5 | 5 |
| Valine, leucine and isoleucine biosynthesis              | 4 | 4 |
| Histidine metabolism                                     | 4 | 4 |
| N-Glycan biosynthesis                                    | 4 | 4 |
| Various types of N-glycan biosynthesis                   | 4 | 4 |
| Glycosaminoglycan degradation                            | 4 | 4 |
| Chloroalkane and chloroalkene degradation                | 4 | 4 |
| Naphthalene degradation                                  | 4 | 4 |
| Butanoate metabolism                                     | 4 | 4 |
| Vitamin B6 metabolism                                    | 4 | 4 |
| Lipoic acid metabolism                                   | 4 | 4 |
| Monoterpenoid biosynthesis                               | 4 | 4 |
| Notch signaling pathway                                  | 4 | 4 |
| Biofilm formation - Vibrio cholerae                      | 4 | 4 |
| Steroid hormone biosynthesis                             | 3 | 3 |
| Aflatoxin biosynthesis                                   | 3 | 3 |

|                                                        |   |   |
|--------------------------------------------------------|---|---|
| Mannose type O-glycan biosynthesis                     | 3 | 3 |
| Streptomycin biosynthesis                              | 3 | 3 |
| Neomycin, kanamycin and gentamicin biosynthesis        | 3 | 3 |
| Glycosylphosphatidylinositol (GPI)-anchor biosynthesis | 3 | 3 |
| Arachidonic acid metabolism                            | 3 | 3 |
| Biosynthesis of unsaturated fatty acids                | 3 | 3 |
| Bacterial secretion system                             | 3 | 3 |
| Non-homologous end-joining                             | 3 | 3 |
| Sulfur relay system                                    | 3 | 3 |
| Fatty acid elongation                                  | 2 | 2 |
| Synthesis and degradation of ketone bodies             | 2 | 2 |
| Geraniol degradation                                   | 2 | 2 |
| Chlorocyclohexane and chlorobenzene degradation        | 2 | 2 |
| Fluorobenzoate degradation                             | 2 | 2 |
| Phenazine biosynthesis                                 | 2 | 2 |
| Selenocompound metabolism                              | 2 | 2 |
| D-Glutamine and D-glutamate metabolism                 | 2 | 2 |
| Polyketide sugar unit biosynthesis                     | 2 | 2 |
| Toluene degradation                                    | 2 | 2 |
| Riboflavin metabolism                                  | 2 | 2 |
| Biosynthesis of ansamycins                             | 2 | 2 |
| Biofilm formation - <i>Pseudomonas aeruginosa</i>      | 2 | 2 |
| Jak-STAT signaling pathway                             | 2 | 2 |
| Photosynthesis - antenna proteins                      | 1 | 1 |
| Monobactam biosynthesis                                | 1 | 1 |
| Lysine biosynthesis                                    | 1 | 1 |
| C5-Branched dibasic acid metabolism                    | 1 | 1 |
| Biotin metabolism                                      | 1 | 1 |
| Atrazine degradation                                   | 1 | 1 |
| Indole alkaloid biosynthesis                           | 1 | 1 |
| Two-component system                                   | 1 | 1 |
| Neuroactive ligand-receptor interaction                | 1 | 1 |

|                                           |   |   |
|-------------------------------------------|---|---|
| SNARE interactions in vesicular transport | 1 | 1 |
|-------------------------------------------|---|---|

---

**Table S3.** Plastid primers used to amplify the *Coffea* samples.

| Gene        | Primer sequences               |
|-------------|--------------------------------|
| <i>matK</i> | F: CGTACAGTACTTTTGTGTTTACGAG   |
|             | R: ACCCAGTCCATCTGGAAATCTTGGTTC |
| <i>rbcL</i> | F: ATGTCACCACAAACAGAGACTAAAGC  |
|             | R: GAAACGGTCTCTCCAACGCAT       |

**Table S4.** Taxa retrieved from NCBI and used in the phylogenetic analyses.

| <b>Genebank ID</b> | <b>Species</b>                     |
|--------------------|------------------------------------|
| MK577911           | <i>Coffea racemosa</i>             |
| JX572420           | <i>Coffea racemosa</i>             |
| MK577910           | <i>Coffea pseudozanguebariae</i>   |
| MK577912           | <i>Coffea stenophylla</i>          |
| MK577913           | <i>Coffea tetragona</i>            |
| MK577907           | <i>Coffea humblotiana</i>          |
| KC758284           | <i>Coffea arabica</i>              |
| MN894552           | <i>Coffea arabica</i>              |
| AB973183           | <i>Coffea arabica</i>              |
| AB973185           | <i>Coffea arabica</i>              |
| AB973184           | <i>Coffea arabica</i>              |
| JN114797           | <i>Coffea arabica</i>              |
| MK875244           | <i>Coffea arabica</i>              |
| MK862266           | <i>Coffea arabica</i>              |
| NC008535           | <i>Coffea arabica</i>              |
| AB973187           | <i>Coffea arabica</i>              |
| AB973188           | <i>Coffea arabica</i>              |
| AB973186           | <i>Coffea arabica</i>              |
| MK577909           | <i>Coffea macrocarpa</i>           |
| GQ248573           | <i>Coffea myrtifolia</i>           |
| KC758293           | <i>Coffea liberica</i>             |
| KC758290           | <i>Coffea liberica v. dewevrei</i> |
| KC758294           | <i>Coffea canephora</i>            |
| AB973189           | <i>Coffea canephora</i>            |
| KC758295           | <i>Coffea canephora</i>            |
| KC628267           | <i>Psilanthus mannii</i>           |

**Table S5.** SSRs primers used to amplify the *Coffea* samples.

| ID       | Primer sequences                 |
|----------|----------------------------------|
| CCRM02   | F: AATGGTGGCAGTCCTGAAAGATC       |
|          | R: AACATCAACTTTCCTGGTCTTC        |
| CCRM07   | F: TAAAGGATGGTATATGTGGCTGGAGTA   |
|          | R: CCACAGCCTCGGCATTACTATATAT     |
| CCRM16   | F: TCCTATAGCAGAAACACAAAATGACACAG |
|          | R: GGTTTTGGGTTCCTTTTAGCATATACA   |
| CCRM17   | F: TAAGCGTTGGAATTCCTCACTCTATCT   |
|          | R: ACAGCTAAAGAAACAATGAACCAGT     |
| CC2P4    | F: TAGCAGCAAACACTCTTCGC          |
|          | R: GCTTCTGACGGACTTGAGGA          |
| CC5P3    | F: CTGTTACAGCCTCGTCCACT          |
|          | R: TCCCGCTACTTTCATGGGAT          |
| CC4P5    | F: CTAGTCTTGGCATGTTGGGG          |
|          | R: CTTTGCTGTGGAGGTAAGGC          |
| CC1P7    | F: GGGGCAAAACAAGAACCACT          |
|          | R: ACCTTATCCAAAACCCATGTGC        |
| CC3P6    | F: CTTGGGATTGCCTAGCCCTA          |
|          | R: TCTTGCCGTTTTAGCCGATT          |
| CC4P8    | F: TGAGAAGGGACAAAGAAAGAGG        |
|          | R: ACAGTACAACATATGAGGCCAC        |
| AJ308790 | F: TTTTCTGGGTTTTCTGTGTTCTC       |
|          | R: TAACTCTCCATTCCCGCATT          |
| AJ308779 | F: TCCCCCATCTTTTCTTTCC           |
|          | R: GGGAGTGTTTTGTGTTGCTT          |
| AJ308809 | F: AGCAAGTGGAGCAGAAGAAG          |
|          | R: CGGTGAATAAGTCGCAGTC           |
| SSR03    | F: GGACAAAACACCGCCCAAAATA        |
|          | R: AGCGAGACAGAGGAAGGAATATT       |

**Table S6.** Summary of sequencing and mapping of reads from *Coffea arabica* and *C. racemosa* samples

| Sample      | Species                | Raw Reads | Clean Reads | GC(%) | Q20   | % mapping |
|-------------|------------------------|-----------|-------------|-------|-------|-----------|
| IR02        | <i>Coffea racemosa</i> | 6395090   | 1753058     | 37.58 | 97.09 | 77.67%    |
| ZV01        | <i>Coffea racemosa</i> | 8312096   | 2060734     | 37.11 | 96.15 | 75.59%    |
| HO04        | <i>Coffea racemosa</i> | 7140830   | 2094006     | 38.61 | 96.42 | 83.51%    |
| MR01        | <i>Coffea racemosa</i> | 5410602   | 1605185     | 36.47 | 96.11 | 78.62%    |
| MR02        | <i>Coffea racemosa</i> | 5865342   | 1852596     | 37.78 | 96.05 | 82.58%    |
| MX05        | <i>Coffea racemosa</i> | 7393166   | 2097160     | 36.32 | 95.31 | 84.04%    |
| MX03        | <i>Coffea racemosa</i> | 4802168   | 1408845     | 37.23 | 95.13 | 84.82%    |
| SF05        | <i>Coffea racemosa</i> | 8806602   | 2520889     | 37.10 | 96.91 | 76.07%    |
| MP05        | <i>Coffea racemosa</i> | 5111332   | 1533854     | 36.71 | 96.36 | 83.34%    |
| MP04        | <i>Coffea racemosa</i> | 8802762   | 2406989     | 37.67 | 95.80 | 82.94%    |
| MR03        | <i>Coffea racemosa</i> | 4277686   | 1348832     | 37.81 | 95.16 | 79.69%    |
| MP08        | <i>Coffea racemosa</i> | 4006454   | 1529142     | 37.53 | 96.09 | 81.00%    |
| HO03        | <i>Coffea racemosa</i> | 4604378   | 1332536     | 37.61 | 96.71 | 77.52%    |
| IR01        | <i>Coffea racemosa</i> | 5766290   | 1554729     | 37.05 | 96.49 | 74.60%    |
| Ca-A650-P3  | <i>Coffea arabica</i>  | 5843528   | 1545682     | 38.28 | 94.54 | 80.53%    |
| Ca-A650-P6  | <i>Coffea arabica</i>  | 6184428   | 1855793     | 38.28 | 96.02 | 81.05%    |
| Ca-A650-P7  | <i>Coffea arabica</i>  | 7465534   | 2325304     | 38.41 | 96.33 | 86.94%    |
| Ca-A650-P8  | <i>Coffea arabica</i>  | 6732436   | 2035553     | 38.27 | 96.93 | 86.26%    |
| Ca-A650-P11 | <i>Coffea arabica</i>  | 4990690   | 1516133     | 38.15 | 94.91 | 77.48%    |
| Ca-A825-P16 | <i>Coffea arabica</i>  | 4524368   | 1424617     | 38.06 | 95.94 | 83.28%    |
| Ca-A825-P18 | <i>Coffea arabica</i>  | 5713418   | 2837142     | 45.73 | 96.14 | 28.89%    |
| Ca-A825-P22 | <i>Coffea arabica</i>  | 7341088   | 2468541     | 38.59 | 97.25 | 82.10%    |
| Ca-A825-P23 | <i>Coffea arabica</i>  | 5385822   | 1576465     | 38.72 | 94.75 | 78.26%    |
| Ca-A825-P16 | <i>Coffea arabica</i>  | 4524368   | 1424617     | 38.06 | 95.94 | 83.28%    |
| Ca-P935-P33 | <i>Coffea arabica</i>  | 4686380   | 1457994     | 38.34 | 94.98 | 82.93%    |
| Ca-P935-P37 | <i>Coffea arabica</i>  | 6320542   | 1694251     | 38.74 | 96.59 | 76.10%    |
| Ca-P935-P38 | <i>Coffea arabica</i>  | 8754090   | 2454975     | 37.79 | 97.15 | 85.33%    |
| Ca-P935-P41 | <i>Coffea arabica</i>  | 5914830   | 1555252     | 38.11 | 96.31 | 86.50%    |
| Ca-P935-P43 | <i>Coffea arabica</i>  | 4168100   | 1269412     | 37.37 | 96.15 | 85.46%    |
